# Supplementary material for: Measurement in the study of menstrual health and hygiene: A systematic review and audit
Source: PLOS journal article supplement (doi:10.1371/journal.pone.0232935), 2020-06-04
Supplement: S2 (10.1371/journal.pone.0232935.s002) [file journal.pone.0232935.s002]

**Supplementary Materials 2.** Author reported concepts measured in trials and nested studies, assessment modality and development

| <b>Trials Study ID</b>          | <b>Trial outcomes (O) and descriptive measures (D)*</b>                                                                                                           | <b>Assessment method</b>                                                                                           | <b>Measure development or validation</b>                                                                                                                          |
|---------------------------------|-------------------------------------------------------------------------------------------------------------------------------------------------------------------|--------------------------------------------------------------------------------------------------------------------|-------------------------------------------------------------------------------------------------------------------------------------------------------------------|
| Abedian 2011 <sup>12</sup>      | (O) Menstrual cycle characteristics (pain and symptoms)<br>(O) Menstrual knowledge<br><br>(O) Menstrual attitudes                                                 | Self-report written survey                                                                                         | Designed by investigators, and criteria from DSM-IV-TR premenstrual syndrome<br>Designed by investigators based on textbooks.<br>Menstrual Attitude Questionnaire |
| Beksinska 2015 <sup>13</sup>    | (O) Acceptability and performance of products<br><br>(O) Adverse events<br>(D) Household WASH<br><br>(D) Menstrual practices and experience                       | Self-report questionnaire (format NR)<br>Product use diary<br>Self-report<br>Self-report questionnaire (format NR) | NR<br><br>NR<br>NR<br><br>NR                                                                                                                                      |
| Blake 2018 <sup>14</sup>        | (O) Menstrual and puberty knowledge<br><br>(O) Attitudes towards menstruation<br>(O) Menstrual fear and shame<br>(D) Menstrual practices<br>(D) WASH observations | Self-report written survey with verbal description in class<br><br><br><br>Observational checklist                 | Adapted from existing evaluations of puberty education materials.<br><br>Field tested with girls in other schools.                                                |
| Dhanalakshmi 2015 <sup>15</sup> | (O) Menstrual/puberty knowledge<br>(O) Beliefs about menstruation<br>(O) Menstrual practices (and sexual behaviours)<br>(D) Menstrual symptoms                    | Self-administered [NR]                                                                                             | NR                                                                                                                                                                |
| Djalalinia 2012 <sup>16</sup>   | (O) Menarche experience<br><br>(O) Menstrual information (source acceptability)<br>(O) Menstrual and hygiene practices<br>(D) Menstrual pain and symptoms         | Self-report written survey                                                                                         | Designed by scientific committee and sent to 10 experts. Stated reliability but not reported.                                                                     |
| El-Mowafy 2014 <sup>17</sup>    | (O) Knowledge<br><br>(O) Self-care practices (including menstrual practices)                                                                                      | Self-report in interview                                                                                           | Developed by investigators. Reviewed by 3 experts. Piloted on 10% of sample                                                                                       |
| Fakhri 2012 <sup>18</sup>       | (O) Menstrual health                                                                                                                                              | Self-report in interview                                                                                           | Developed by investigators, tested via input from adolescents, scientists and community experts. Test-retest reliability with 20 students.                        |
| Fetohy 2007 <sup>19</sup>       | (O) Menstrual knowledge<br><br>(O) Menstrual attitudes                                                                                                            | Self-report written survey                                                                                         | Designed by investigators, pilot-testing stated with no further detail.                                                                                           |

|                                    |                                                                                                                                                                                                                                         |                                                                                                                                                                                                                 |                                                                                                                                                                       |
|------------------------------------|-----------------------------------------------------------------------------------------------------------------------------------------------------------------------------------------------------------------------------------------|-----------------------------------------------------------------------------------------------------------------------------------------------------------------------------------------------------------------|-----------------------------------------------------------------------------------------------------------------------------------------------------------------------|
|                                    | (O) Menstrual behaviour                                                                                                                                                                                                                 |                                                                                                                                                                                                                 |                                                                                                                                                                       |
| Leventhal 2016 <sup>20</sup>       | (O) Overarching trial outcomes included general health knowledge, gender equality attitudes, WASH, hand washing and health care utilisation<br>(O) Psychosocial wellbeing, resilience, social-emotional assets<br>(O) Menstrual hygiene | Self-report written surveys in groups with assistants to help with reading/understanding                                                                                                                        | Pre-tested questionnaires including investigator-developed and previously established measures. Piloted with 74 girls in neighbouring area.                           |
| Mbizvo 1997 <sup>21 22</sup>       | (O) Reproductive health and menstrual knowledge                                                                                                                                                                                         | Self-report written survey                                                                                                                                                                                      | NR                                                                                                                                                                    |
| Mohamed 2014 <sup>23</sup>         | (O) Discomfort/comfort with products after physical activity<br>(O) Physical exertion                                                                                                                                                   | Self-report on visual analogy scale and survey. Heart rate variability measured using electrocardiograph. Self-reported exertion. Heart rate low-frequency to high-frequency ratio.                             | NR<br>Previously validated measures/ biomarkers.                                                                                                                      |
| Montgomery 2012 <sup>24 25</sup>   | (O) School attendance<br><br>(D) Menstrual cycle and product use<br>(O) Subjective shame and well-being<br><br>(O) Classroom participation                                                                                              | Attendance registers<br><br>Self-completed menstrual diaries<br>Self-report with interviewer<br><br>Self-report with interviewer                                                                                | Attendance registers were compared with spot-checks and found to be reliable.<br>NR<br>Adapted from established/ recommended dimensions of noneconomic poverty.<br>NR |
| Montgomery 2016 <sup>26</sup>      | (O) School attendance<br><br>(O) Wellbeing<br><br>(O) Subjective shame<br>(O) Menstrual knowledge<br>(D) WASH facilities                                                                                                                | Attendance registers/ spot-checks<br>Self-report with interviewer (responses entered electronically)<br><br>Observational checklist                                                                             | Tools piloted in Ghana during pilot (Montgomery 2012)<br><br>NR                                                                                                       |
| Oster 2011 <sup>29</sup>           | (O) School attendance (during menstruation)                                                                                                                                                                                             | School registers combined with self-completed menstrual diaries                                                                                                                                                 | NR.                                                                                                                                                                   |
| Phillips-Howard 2016 <sup>31</sup> | (O) School attendance<br><br>(O) School drop out<br>(O) Sexually transmitted or reproductive tract infection<br>(O) Adverse events<br>(D) Menstrual characteristics<br><br>(D) Wellbeing<br><br>(D) WASH facilities                     | Self-completed calendars<br><br>Absence from nurse visits<br>Self-taken vaginal swabs.<br><br>TSS - vaginal swabs<br>Self-report survey. NR further details<br>Self-report survey.<br><br>Observation checklist | NR<br>Lab testing for presence of STI/RTI<br><br>NR<br>Paediatric Quality of Life Inventory (PEDSQL)<br>NR                                                            |
| Sener 2019 <sup>37</sup>           | (O) Hygiene skills and behaviours (including menstrual hygiene)                                                                                                                                                                         | Self-report in interview with study staff + study staff repeated observations.                                                                                                                                  | Researcher developed based on past literature with review by 10 experts. Piloted on 5 non-participating teens and parents.                                            |

|                                 |                                                                                                                                                                                    |                                                                                                                                                                                           |                                                                                                                                                                |
|---------------------------------|------------------------------------------------------------------------------------------------------------------------------------------------------------------------------------|-------------------------------------------------------------------------------------------------------------------------------------------------------------------------------------------|----------------------------------------------------------------------------------------------------------------------------------------------------------------|
| Setyowati 2019                  | (O) Knowledge about menstruating and puberty<br>(O) Emotional responses to menarche<br>(O) Menstrual attitude questionnaire                                                        | NR.                                                                                                                                                                                       | Developed in past research and adapted for context.<br>Questions developed from past studies<br>Previously validated measure: Menstrual Attitude Questionnaire |
| Sharma 2015 <sup>39</sup>       | (O) Menstrual knowledge<br><br>(O) Menstrual hygiene practices                                                                                                                     | Survey. NR.                                                                                                                                                                               | Researcher developed questionnaire with input from expert. Post-hoc reliability calculated.                                                                    |
| Shrestha 2018 <sup>40</sup>     | (O) Demand for menstrual products<br><br>(D) Menstrual knowledge<br><br>(D) Menstrual stigma and norms<br>(D) Health and sanitation (incl. Menstrual practices)                    | Coupon redemption in local stores.<br><br>Self-report with interviewer                                                                                                                    | Researcher spot checks on store-recorded coupon redemption and physical storage of coupons.<br>NR                                                              |
| Stadler 2006 <sup>41</sup>      | (O) Physical discomfort<br><br>(O) Product acceptance<br>(D) Product use and menstrual practices                                                                                   | Self-reported questionnaire<br><br>Product use diary (self-completed)                                                                                                                     | NR<br><br>NR                                                                                                                                                   |
| Valizadeh 2017 <sup>42,43</sup> | (O) Menstrual knowledge<br><br>(O) Menstrual practices<br>(O) Menstrual attitudes                                                                                                  | Self-report survey (NR methodology)                                                                                                                                                       | Questionnaires adapted from past studies and checked by 11 faculty. Post-hoc reliability reported.                                                             |
| Wilson 2014 <sup>44,45</sup>    | (O) School attendance<br><br>(D) Acceptability of intervention<br>(D) Menstrual hygiene practices                                                                                  | Self-reported written survey with facilitator providing verbal translation                                                                                                                | NR                                                                                                                                                             |
| Womana 2018 <sup>46</sup>       | (D) Menstrual practices<br><br>(D) Menstrual factors<br>(D) Menstrual product preference and experience<br>(D) Menstrual knowledge<br>(O) Experiences of the intervention/products | Self-reported in interview recorded electronically<br>Self-completed diaries<br>Surveys and diaries<br><br>Self-completed form test<br>Self-reported in interview recorded electronically | Pilot evaluation designed to test the acceptability of tools                                                                                                   |
| <b>Nested Study ID</b>          | <b>Variables measures as Predictors (P), Outcomes (O) or for Description (D)</b>                                                                                                   | <b>Assessment method</b>                                                                                                                                                                  | <b>Measure development or validation</b>                                                                                                                       |
| Hennegan 2016a <sup>27</sup>    | (P) Menstrual practice<br><br>(O) Product preference and experiences<br>(O) Menstrual restrictions                                                                                 | Self-report with interviewer (responses entered electronically)                                                                                                                           | Tools piloted past study (Montgomery 2012)                                                                                                                     |
| Hennegan 2016b <sup>28</sup>    | (P/O) Menstrual hygiene<br><br>(O) Health and symptoms                                                                                                                             | Self-report with interviewer (responses entered electronically)                                                                                                                           | Tools piloted past study (Montgomery 2012)                                                                                                                     |

|                              |                                                                                                                                                                             |                                                                                                                  |                                                                                                                         |
|------------------------------|-----------------------------------------------------------------------------------------------------------------------------------------------------------------------------|------------------------------------------------------------------------------------------------------------------|-------------------------------------------------------------------------------------------------------------------------|
|                              | (O) Education engagement<br>(O) Psychosocial wellbeing                                                                                                                      |                                                                                                                  |                                                                                                                         |
| Oster 2012 <sup>30</sup>     | (P) Peer product use<br>(O) Menstrual cup use/adoption                                                                                                                      | Self-report survey<br>Interview with nurse<br>Monthly diaries                                                    | NR<br>NR                                                                                                                |
| Nyothach 2015 <sup>32</sup>  | (O) Handwashing during menstrual practices<br>(P) Menstrual product used                                                                                                    | Self-completed electronic survey                                                                                 | Piloted paper questionnaires prior to use in electronic netbooks                                                        |
| Odour 2015 <sup>33</sup>     | (O) Dropping menstrual items and disposal<br>(P) Menstrual product use                                                                                                      | Self-completed electronic survey                                                                                 | Piloted paper questionnaires prior to use in electronic netbooks                                                        |
| Juma 2017 <sup>34</sup>      | (O) Adverse health outcomes                                                                                                                                                 | Self-collected vaginal swabs with lab testing                                                                    | N/A                                                                                                                     |
| Van Eijk 2018 <sup>35</sup>  | (O) Observed menstrual cup colour change<br>(O) Observed menstrual cup damage<br>(P) Self-reported menstrual cup use<br>(P) Menstrual characteristics (time since menarche) | Nurse observation<br>Nurse observation<br>Self-reported interview with nurse<br>Self-completed electronic survey | NR<br>NR<br>Piloted paper questionnaires prior to use in electronic netbooks                                            |
| Alexander 2018 <sup>36</sup> | (O) Observed WASH facilities<br>(O) Teacher-reported WASH                                                                                                                   | Observational checklist<br>Teacher interview                                                                     | NR                                                                                                                      |
| Tolonen 2019                 | (O) School attendance<br><br>(D) Menstrual characteristics                                                                                                                  | School registers and spot checks<br>Self-report survey                                                           | Two methods compared. Spot checks were unannounced.<br>Piloted paper questionnaires prior to use in electronic netbooks |

\*Excludes demographic characteristics.
